# Supplementary material for: Genomic Analysis of Resistance to Fall Armyworm (Spodoptera frugiperda) in CIMMYT Maize Lines
Source: MDPI journal article supplement (doi:10.3390/genes13020251), 2022-01-28
Supplement: s1 [file s1]

## Supplementary Materials

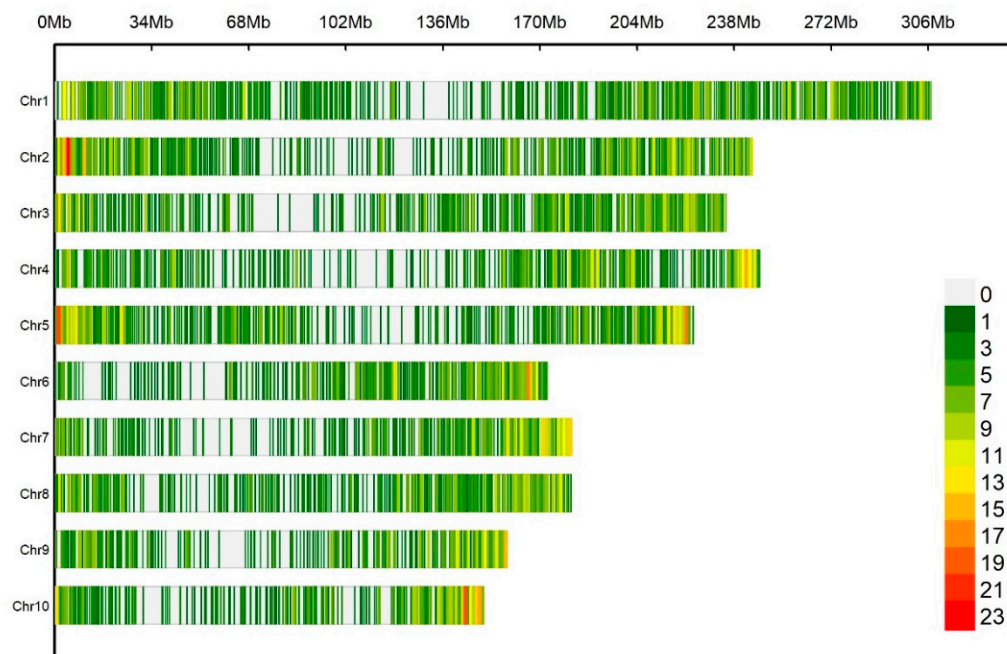

**Supplementary Figure S1.** Density plot showing the number SNPs within 1 Mb window size from the studied 7,100 markers. The number of SNPs is displayed on a scale from green to red.

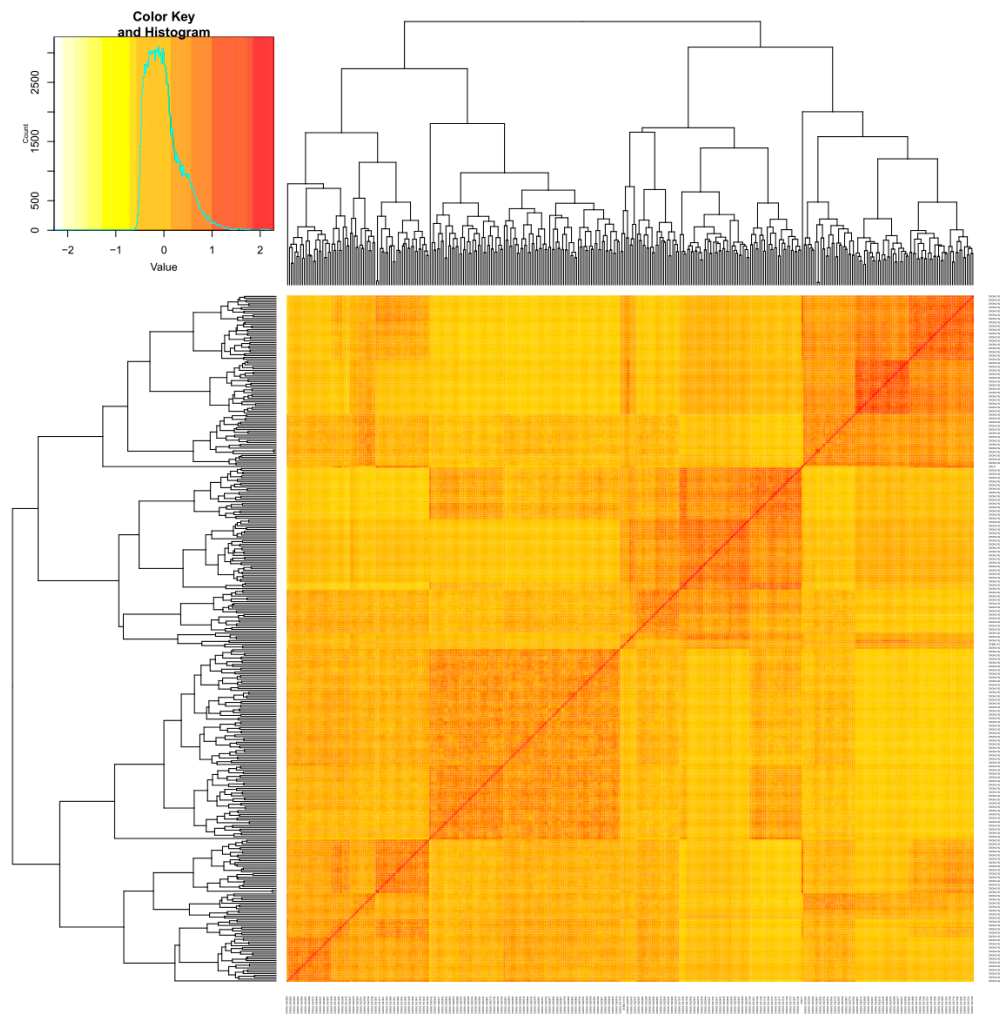

**Supplementary Figure S2.** Kinship Analysis of the FAW GWAS panel. The heat map shows the pairwise kinship matrix based on 7,100 filtered SNPs.
